# Supplementary material for: Brain microstructural and metabolic alterations detected in vivo at onset of the first demyelinating event
Source: Oxford University Press journal article supplement (doi:10.1093/brain/awab043), 2021-02-05
Supplement: awab043_supplementary_data.pdf [file awab043_supplementary_data.pdf]

**Supplementary Table 1. Cortical and white matter areas in which neurite density index, orientation dispersion index and total sodium concentration have been computed**

| <b>Areas</b>                                   | <b>Structures</b>                                 | <b>Side</b> |
|------------------------------------------------|---------------------------------------------------|-------------|
| <b>Grey Matter</b>                             |                                                   |             |
| <b>Cerebellum Grey Matter</b>                  | Vermis, Lobes                                     | L+R         |
| <b>Thalamus</b>                                | Thalamus                                          | L; R        |
| <b>Limbic Lobe</b>                             | ACgG, MCgG, PCgG, PHG, Ent, Amigdala, Hippocampus | L; R        |
| <b>Hippocampus</b>                             | Hippocampus                                       | L; R        |
| <b>Insula</b>                                  | AIns, PIns                                        | L; R        |
| <b>Orbitofrontal cortex</b>                    | AOrG, POrG, MOrG, LOrG, GRe, SCA                  | L; R        |
| <b>Medial Frontal cortex</b>                   | Medial Frontal cortex                             | L; R        |
| <b>Middle Frontal gyrus</b>                    | Middle Frontal gyrus                              | L; R        |
| <b>Superior Frontal gyrus</b>                  | SFG, MSFG                                         | L; R        |
| <b>Inferior Frontal gyrus</b>                  | OpIFG, OrIFG, TrIFG                               | L; R        |
| <b>Precentral gyrus</b>                        | MPrG, PrG                                         | L; R        |
| <b>Operculum</b>                               | CO, FO, PO                                        | L; R        |
| <b>Postcentral gyrus</b>                       | PoG, MPoG                                         | L; R        |
| <b>Cognitive Areas of the Parietal lobe</b>    | AnG, PCu, SMG, SPL                                | L; R        |
| <b>Superior-lateral Temporal lobe</b>          | MTG, TTG, STG, PP, PT                             | L; R        |
| <b>Medial-inferior Temporal lobe</b>           | FuG, ITG, TMP                                     | L; R        |
| <b>Primary Visual cortex</b>                   | Calc, Cun, OCP                                    | L; R        |
| <b>Lingual gyrus</b>                           | Lingual gyrus                                     | L; R        |
| <b>Associative Areas of the Occipital lobe</b> | IOG, MOG, SOG, OFuG                               | L; R        |
| <b>White Matter</b>                            |                                                   |             |
| <b>Cerebellar white matter</b>                 |                                                   | L+ R        |
| <b>Insular white matter</b>                    |                                                   | L+ R        |
| <b>Frontal white matter</b>                    |                                                   | L+R         |
| <b>Parietal white matter</b>                   |                                                   | L+ R        |
| <b>Temporal white matter</b>                   |                                                   | L+ R        |
| <b>Occipital white matter</b>                  |                                                   | L+ R        |
| <b>Corpus Callosum</b>                         |                                                   | -           |

Note: parcellations were based on the the Desikan-Killiany-Tourville protocol (Klein and Tourville, 2012)

*Abbreviations:* ACgG: anterior cingulate gyrus; MCgG: middle cingulate gyrus; PCgG: posterior cingulate gyrus; PHG: parahippocampal gyrus; Ent: entorhinal area; AIns: anterior insula; Pins: posterior insula; AOrG: anterior orbital gyrus; POrG: posterior orbital gyrus;

MOrG: medial orbital gyrus; LOrG: lateral orbital gyrus; GRe: gyrus rectus; SCA:sub-callosal area; SFG: superior frontal gyrus; MSFG: superior frontal gyrus medial segment; OpIFG: opercular part of the inferior frontal gyrus; OrIFG: orbital part of the inferior frontal gyrus; TrIFG: triangular part of the inferior frontal gyrus; MPrG: precentral gyrus medial segment; PrG: precentral gyrus; CO: central operculum; FO: frontal operculum; PO: parietal operculum; PoG: postcentral gyrus; MPoG: postcentral gyrus medial segment; AnG: angular gyrus; PCu: pre-cuneus; SMG: supramarginal area; SPL: superior parietal lobule; MTG: middle temporal gyrus; TTG: transverse temporal gyrus; STG: superior temporal gyrus; PP: planum polare: PT: planum temporale; FuG: fusiform gyrus; ITG: inferior temporal gyrus; TMP: temporal pole; Calc: calcarine cortex; Cun: cuneus; OCP: occipital pole; IOG: inferior occipital gyrus MOG: middle occipital gyrus; SOG: superior occipital gyrus; OFuG: occipital fusiform gyrus.

**Supplementary Table 2. Borderline significant association (0.01<p-value<0.05) between clinical parameters and neurite density index, orientation dispersion index and total sodium concentration**

| <b>Dependent Variable</b>                            | <b>Independent Variable</b>     | <b>Unstandardized coefficient (B)</b> | <b>Confidence Interval 95%</b> | <b>p-value</b> | <b>R<sup>2</sup></b> |
|------------------------------------------------------|---------------------------------|---------------------------------------|--------------------------------|----------------|----------------------|
| 9-hole peg test                                      | Left limbic lobe TSC            | 0.52                                  | 0.12 to 0.93                   | 0.012          | 0.19                 |
| SDMT (z-score)                                       | Left frontal middle gyrus ODI   | 0.06                                  | 0.0004 to 0.01                 | 0.038          | 0.11                 |
| CVLT-II (z-score)                                    | Right primary visual cortex NDI | -0.09                                 | -0.02 to -0.0004               | 0.039          | 0.12                 |
| BVMT-R (z-score)                                     | Right operculum ODI             | -0.01                                 | -0.02 to -0.001                | 0.028          | 0.12                 |
| <b>With T2-hyprintese lesion volume as covariate</b> |                                 |                                       |                                |                |                      |
| 9-hole peg test                                      | Left limbic lobe TSC            | 0.52                                  | 0.12 to 0.93                   | 0.012          | 0.19                 |
| SDMT (z-score)                                       | Left frontal middle gyrus ODI   | 0.06                                  | 0.0003 to 0.01                 | 0.04           | 0.11                 |
| CVLT-II (z-score)                                    | Right primary visual cortex NDI | -0.09                                 | -0.02 to -0.0006               | 0.037          | 0.12                 |
| BVMT-R (z-score)                                     | Right operculum ODI             | -0.01                                 | -0.02 to -0.0009               | 0.031          | 0.12                 |
| <b>With brain parenchymal fraction as covariate</b>  |                                 |                                       |                                |                |                      |
| 9-hole peg test                                      | Left limbic lobe TSC            | 0.52                                  | 0.12 to 0.93                   | 0.012          | 0.19                 |
| SDMT (z-score)                                       | Left frontal middle gyrus ODI   | 0.06                                  | -0.000009 to 0.01              | 0.05           | 0.11                 |
| CVLT-II (z-score)                                    | Right primary visual cortex NDI | -0.08                                 | -0.02 to 0.0003                | 0.057          | 0.12                 |
| BVMT-R (z-score)                                     | Right operculum ODI             | -0.009                                | -0.02 to -0.00009              | 0.048          | 0.12                 |

Note: results are from linear regression model

Abbreviations: SDMT: symbol digit modality test; CVLT-II: California Verbal Learning Test-II; BVMT-R: brief visuospatial memory test-revised
